# Supplementary material
Source: publisher figshare collection journal article supplement (https://adisjournals.figshare.com/articles/dataset/_/14433932)
Supplement: Supplementary file 1 [file 2]

# Effectiveness and Tolerability of the Single-Pill Combination of **Bisoprolol** and **Perindopril** in Patients with Arterial Hypertension and Stable Coronary Artery Disease in Daily Clinical Practice: The STYLE Study. *Adv Ther.* 2021

PEER-REVIEWED  
INFOGRAPHIC

OPEN  
ACCESS

SA Boytsov, YP Burtsev, YV Khomitskaya, YA Karpov, on behalf of the STYLE study investigators

- **Real-world** study
- **1892 adults** with **hypertension** and **stable angina**
- **370 GPs** and **cardiologists** in **Russia**

Patients on **bisoprolol**, or **perindopril**, or both **switched** to a **single-pill combination (SPC)** of **bisoprolol / perindopril** in **addition** to other **antihypertensive drugs**

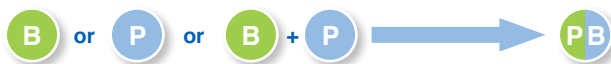

Mean BP  
**158/93 mm Hg**

Mean HR  
**82.5 bpm**

Male  
**46.2%**

No regular  
exercise  
**66.0%**

Mean age  
**61.9 years**

Smoking  
**26.6%**

**ONE MONTH** after treatment  
with **bisoprolol / perindopril SPC**

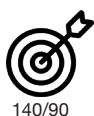

**49%**  
at target BP

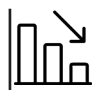

Mean BP reduction  
**22.3/11.0 mm Hg\*\***  
versus baseline

**THREE MONTHS** after treatment  
with **bisoprolol / perindopril SPC**

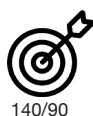

**87%**  
at target BP

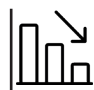

Mean BP reduction  
**31.5/15.9 mm Hg\*\***  
versus baseline

\*\*P<0.0001 vs baseline

**Heart rate, angina attacks, and use of short-acting nitrates also decreased** after treatment with **bisoprolol / perindopril SPC**

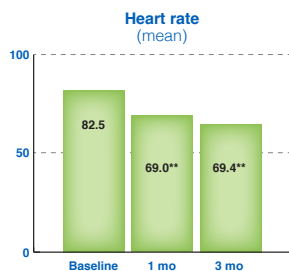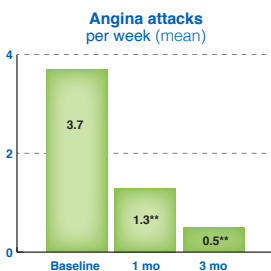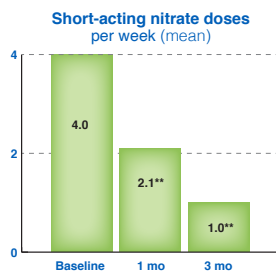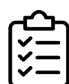

**57% had good adherence at 3 months**  
(up from 37% at 1 month)

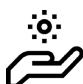

**Quality of life (VAS) improved**  
(47 mm at baseline to 82 mm at 3 months)

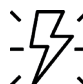

**Adverse events were rare**  
9 events in 4 patients

**Results support the use of single-pill bisoprolol/perindopril to reduce BP and HR in patients with hypertension and angina**
